# Supplementary material for: An oxidative Hosomi-Sakurai strategy toward the synthesis of illioliganones B and C
Source: Royal Society of Chemistry journal article supplement (doi:10.1039/c1ra00095k), 2011-01-01
Supplement: c1ra00095k.pdf [file c1ra00095k.pdf]

# An oxidative Hosomi-Sakurai strategy toward the synthesis of illioliganones B and C

Wesley J. Moran,\* and Arantxa Rodríguez

*Department of Chemical & Biological Sciences, University of Huddersfield, Huddersfield HD1 3DH (UK)*

E-mail: [w.j.moran@hud.ac.uk](mailto:w.j.moran@hud.ac.uk)

## Contents

|                                  |    |
|----------------------------------|----|
| General experimental information | S2 |
| Experimental procedures          | S2 |
| Copies of NMR spectra            | S8 |

**General.**  $^1\text{H}$  NMR spectra were recorded at 400 or 500 MHz.  $^{13}\text{C}$  NMR spectra were recorded at 100 or 125 MHz. Chemical shifts are reported in ppm from tetramethylsilane with the solvent resonance as the internal standard ( $\text{CDCl}_3$ : 7.26 ppm). Data are reported as follows: chemical shift, integration, multiplicity (s = singlet, d = doublet, t = triplet, q = quartet, br = broad, m = multiplet), and coupling constants (Hz).  $^{13}\text{C}$  NMR were recorded with complete proton decoupling. Chemical shifts are reported in ppm from tetramethylsilane with the solvent as the internal standard ( $\text{CDCl}_3$ : 77.4 ppm). Mass spectrometry (m/z) was performed in ESI mode, with only molecular ions being reported. Infrared (IR) spectra  $\nu_{\text{max}}$  are reported in  $\text{cm}^{-1}$ . Bands are characterised as broad (br), strong (s), medium (m) and weak (w). All purchased reagents were used as received without further purification. THF was pre-dried with 3A molecular sieves then distilled from sodium benzophenone ketyl. Petroleum ether refers to the fraction boiling at 40-60 °C. Isobutyl 2-methylbut-3-en-2-yl carbonate was prepared according to a literature method.<sup>1</sup>

### Synthesis of 6-(3-methylbut-2-enyl)benzo[d][1,3]dioxol-5-ol, **3**

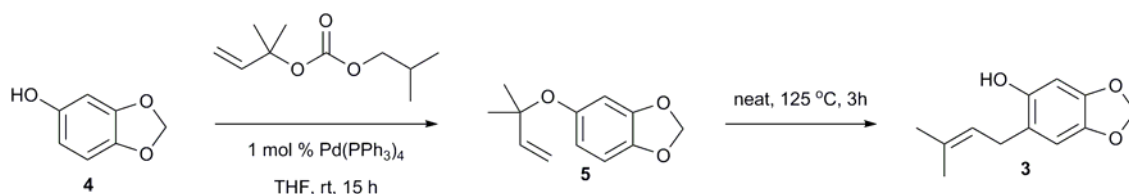

Isobutyl 2-methylbut-3-en-2-yl carbonate (3.28 g, 18 mmol, 1.3 equiv) and sesamol (1.87 g, 14 mmol, 1 equiv) were dissolved in THF (50 mL) at room temperature under a nitrogen atmosphere. Tetrakis(triphenylphosphine) palladium(0) (162 mg, 0.14 mmol, 0.01 equiv) was added in one portion and the mixture was stirred for 15h. The reaction mixture was concentrated, then diluted with 20:1 petroleum ether/ethyl acetate and filtered through celite to remove the palladium salts. The resulting solution was concentrated and then heated neat at 125 °C for 3 h. The mixture was purified by flash chromatography on silica gel using 20:1 petroleum ether/ethyl acetate to furnish **3** as a colourless oil (2.6 g, 90%).

IR (neat): 1036 (s), 1164 (s), 1439 (m), 1481 (m), 1503 (m), 3452 (br)  $\text{cm}^{-1}$ .

$^1\text{H}$  NMR (400 MHz,  $\text{CDCl}_3$ ):  $\delta$  1.76 (6H, s), 3.24 (2H, d,  $J = 7.2$  Hz), 4.96 (1H, s), 5.22-5.29 (1H, m), 5.86 (2H, s), 6.41 (1H, s), 6.57 (1H, s).

$^{13}\text{C}$  NMR (100 MHz,  $\text{CDCl}_3$ ):  $\delta$  18.2, 26.2, 30.0, 98.9, 101.3, 109.5, 118.8, 122.2, 135.3, 141.6, 146.7, 149.1.

MS: m/z (M-1) 205.1

HRMS: m/z calc'd for  $\text{C}_{12}\text{H}_{13}\text{O}_3$  205.0870, found 205.0867.

<sup>1</sup> B. Plietker, A. Dieskau, K. Möws and A. Jatsch, *Angew. Chem., Int. Ed.* 2008, **47**, 198.

## Synthesis of trimethyl(6-(3-methylbut-2-enyl)benzo[*d*][1,3]dioxol-5-yloxy)silane, **6**

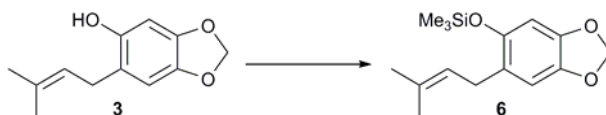

6-(3-Methylbut-2-enyl)benzo[*d*][1,3]dioxol-5-ol (270 mg, 1.3 mmol, 1 equiv), **3**, was dissolved in THF (2.4 mL) at room temperature under a nitrogen atmosphere. Triethylamine (0.49 mL, 3.5 mmol, 2.4 equiv), followed by chlorotrimethylsilane (0.48 mL, 3.8 mmol, 2.6 equiv), was added slowly to the reaction mixture. After 1 h, the crude mixture was filtered through celite, washed through with petroleum ether, and concentrated. If any triethylaminehydrochloride salt remained, 20:1 petroleum ether/ethyl acetate was added to the sample which was then filtered again and concentrated. The product, **6**, was isolated as a clear pale yellow oil (370 mg, 100%) which was taken through to the next step without further purification.

IR (neat): 1157 (s), 1182 (s), 1479 (s), 2962 (w)  $\text{cm}^{-1}$ .

$^1\text{H}$  NMR (400 MHz,  $\text{CDCl}_3$ ):  $\delta$  0.26 (9H, s), 1.70 (3H, s), 1.74 (3H, s), 3.19 (2H, d,  $J = 7.3$  Hz), 5.19-5.29 (1H, m), 5.87 (2H, s), 6.38 (1H, s), 6.62 (1H, s).

$^{13}\text{C}$  NMR (100 MHz,  $\text{CDCl}_3$ ):  $\delta$  0.72, 18.1, 26.1, 28.7, 101.2, 101.7, 109.3, 123.3, 124.7, 132.7, 142.0, 145.9, 147.3.

MS: unable to obtain MS data because of lability of O-Si bond.

## Procedure for the oxidative Hosomi-Sakurai reaction

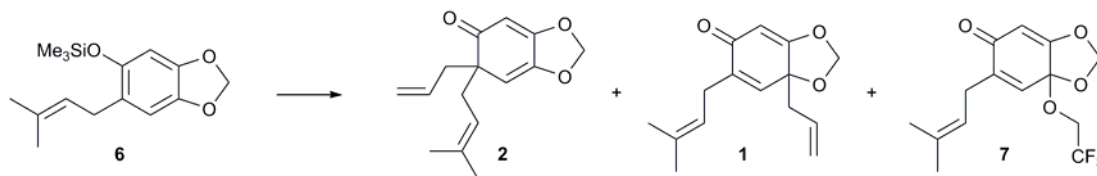

Trimethyl(6-(3-methylbut-2-enyl)benzo[*d*][1,3]dioxol-5-yloxy)silane, **6** (45 mg, 0.16 mmol, 1 equiv) was dissolved in trifluoroethanol (1 mL) at room temperature and stirred open to air. Sodium bicarbonate (40 mg, 0.48 mmol, 3 equiv) was added, followed by allyltrimethylsilane (0.039 mL, 0.24 mmol, 1.5 equiv). Iodobenzene diacetate (77 mg, 0.24 mmol, 1.5 equiv) was dissolved in trifluoroethanol (0.5 mL) and added over 10 seconds to the reaction mixture. After stirring the dark red solution for about 1 hour, saturated aqueous sodium bicarbonate solution was added and the mixture was extracted with ethyl acetate. This was dried over  $\text{MgSO}_4$ , filtered, concentrated, then purified by flash chromatography on silica gel with 20:1 to 5:1 petroleum ether/ethyl acetate to furnish three compounds as colourless oils (**2**: 15 mg, 38%; **1**: 3 mg, 8%, **7**: 10 mg, 21%).

Data for 6-allyl-6-(3-methylbut-2-enyl)benzo[*d*][1,3]dioxol-5(6*H*)-one, **2**

IR (neat): 1219 (s), 1385 (s), 1626 (s)  $\text{cm}^{-1}$ .

<sup>1</sup>H NMR (400 MHz, CDCl<sub>3</sub>): δ 1.57 (3H, s), 1.62 (3H, s), 2.14-2.28 (2H, m), 2.51 (1H, dd, *J* = 14, 7.4 Hz), 2.59 (1H, dd, *J* = 14, 7.2 Hz), 4.86-5.04 (3H, m), 5.41 (1H, s), 5.47-5.62 (1H, m), 5.60 (1H, s), 5.80 (1H, s), 5.81 (1H, s).

<sup>13</sup>C NMR (100 MHz, CDCl<sub>3</sub>): δ 18.4, 26.3, 39.6, 45.1, 54.4, 99.9, 101.6, 109.1, 118.4, 118.7, 133.5, 135.3, 144.3, 164.4, 202.8.

MS: *m/z* (M+23) 269.1

HRMS: *m/z* calc'd for C<sub>15</sub>H<sub>18</sub>NaO<sub>3</sub> 269.1148, found 269.1136.

Data for 7a-allyl-6-(3-methylbut-2-enyl)benzo[*d*][1,3]dioxol-5(7a*H*)-one, **1**

IR (neat): 1175 (s), 1621 (s), 1676 (m), 2913 (w) cm<sup>-1</sup>.

<sup>1</sup>H NMR (400 MHz, CDCl<sub>3</sub>): δ 1.60 (3H, s), 1.74 (3H, s), 2.38 (1H, dd, *J* = 14, 7.6 Hz), 2.60 (1H, dd, *J* = 14, 7.1 Hz), 2.94 (1H, dd, *J* = 17, 7.3 Hz), 3.03 (1H, dd, *J* = 17, 7.3 Hz), 5.02-5.18 (3H, m), 5.55 (1H, s), 5.56-5.68 (1H, m), 5.58 (1H, s), 5.62 (1H, s), 6.56 (1H, t, *J* = 1.7 Hz).

<sup>13</sup>C NMR (100 MHz, CDCl<sub>3</sub>): δ 18.0, 26.1, 27.9, 40.9, 81.4, 98.3, 98.9, 120.3, 121.2, 130.5, 133.9, 135.2, 140.7, 173.9, 187.9.

MS: *m/z* (M+23) 269.1

HRMS: *m/z* calc'd for C<sub>15</sub>H<sub>18</sub>NaO<sub>3</sub> 269.1148, found 269.1159.

Data for 6-(3-methylbut-2-enyl)-7a-(2,2,2-trifluoroethoxy)benzo[*d*][1,3]dioxol-5(7a*H*)-one, **7**

IR (neat): 1103 (s), 1123 (s), 1268 (m), 1280 (m), 1635 (m), 1654 (m), 1690 (m) cm<sup>-1</sup>.

<sup>1</sup>H NMR (400 MHz, CDCl<sub>3</sub>): δ 1.61 (3H, s), 1.76 (3H, s), 2.99 (1H, dd, *J* = 18, 7.3 Hz), 3.09 (1H, dd, *J* = 18, 7.3 Hz), 3.72-3.95 (2H, m), 5.09-5.17 (1H, m), 5.63 (1H, s), 5.63 (1H, s), 5.67 (1H, s), 6.52 (1H, t, *J* = 1.8 Hz).

<sup>13</sup>C NMR (100 MHz, CDCl<sub>3</sub>): δ 18.0, 26.1, 28.1, 98.2, 99.4, 99.9, 119.2, 122.2, 125.0, 125.6, 136.3, 144.7, 167.1, 186.8.

MS: *m/z* (M+23) 327.1

HRMS: *m/z* calc'd for C<sub>14</sub>H<sub>15</sub>F<sub>3</sub>NaO<sub>4</sub> 327.0815, found 327.0814.

## Synthesis of illioliganone C by Upjohn dihydroxylation

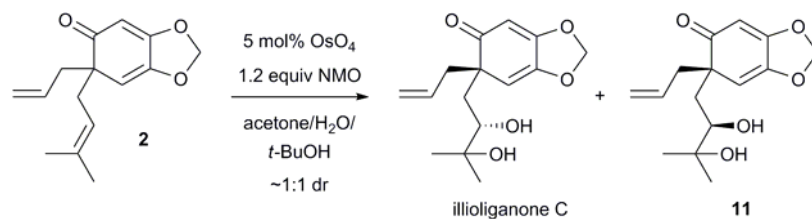

6-Allyl-6-(3-methylbut-2-enyl)benzo[*d*][1,3]dioxol-5(6*H*)-one, **2**, (160 mg, 0.65 mmol, 1 equiv) was dissolved in acetone (0.3 mL), water (0.72 mL) and *t*-butanol (0.3 mL) at room temperature. *N*-Methylmorpholine *N*-oxide (132 mg, 0.98 mmol, 1.5 equiv) was added to the reaction mixture followed by osmium tetroxide (8 mg, 0.031 mmol, 0.05 equiv). After stirring for 3h, water was added and the mixture extracted with ethyl acetate. The organic layer was separated, dried over MgSO<sub>4</sub>, filtered and concentrated. Purification by flash chromatography on silica gel using 2:1 petroleum ether/ethyl acetate was undertaken two times and illioliganone C was isolated.

IR (neat): 1221 (s), 1385 (s), 1626 (s) cm<sup>-1</sup>.

<sup>1</sup>H NMR (500 MHz, acetone-*d*<sup>6</sup>): δ 1.06 (6H, s), 1.83 (1H, dd, *J* = 13.7, 1.8 Hz), 2.04-2.10 (1H, m), 2.24 (1H, dd, *J* = 13.0, 7.5 Hz), 2.48 (1H, dd, *J* = 13.1, 7.1 Hz), 3.06 (1H, d, *J* = 6.4 Hz), 3.29 (1H, s), 3.34 (1H, ddd, *J* = 10.7, 6.4, 1.9 Hz), 4.87-5.00 (2H, m), 5.46 (1H, s), 5.52-5.64 (1H, m), 5.54 (1H, s), 5.88 (1H, s), 5.90 (1H, s).

Literature values:<sup>2</sup> (400 MHz, acetone-*d*<sup>6</sup>): δ 1.07 (s), 1.82 (dd, *J* = 13.6, 2.0 Hz), 2.10 (d, *J* = 13.6 Hz), 2.24 (dd, *J* = 13.2, 7.2 Hz), 2.48 (dd, *J* = 13.2, 7.2 Hz), 3.05 (d, *J* = 6.0 Hz), 3.27 (s), 3.33 (m), 4.91 (dd, *J* = 10.0, 2.0 Hz), 4.96 (dd, *J* = 16.8, 2.0 Hz), 5.46 (s), 5.54 (s), 5.57 (m), 5.88 (s), 5.89 (s).

<sup>13</sup>C NMR (125 MHz, acetone-*d*<sup>6</sup>): δ 25.4, 25.7, 43.3, 46.9, 52.4, 72.6, 76.6, 99.7, 102.4, 108.4, 118.0, 134.3, 145.1, 163.8, 202.0.

Literature values: (100 MHz, acetone-*d*<sup>6</sup>): δ 25.4, 25.7, 43.3, 46.9, 52.3, 72.6, 76.3, 99.6, 102.3, 108.3, 117.9, 134.2, 145.1, 163.8, 202.1.

MS: *m/z* (M+23) 303.1

HRMS: *m/z* calc'd for C<sub>15</sub>H<sub>20</sub>NaO<sub>5</sub> 303.1203, found 303.1203

<sup>2</sup> W.-Z. Tang, S.-G. Ma, S.-S. Yu, J. Qu, Y.-B. Liu and J. Liu, *J. Nat. Prod.*, 2009, **72**, 1017.

### Synthesis of 6-allyl-6-((3,3-dimethyloxiran-2-yl)methyl)benzo[*d*][1,3]dioxol-5(6*H*)-one, **12**

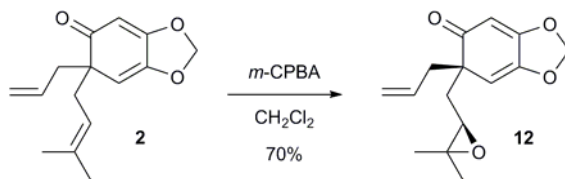

6-Allyl-6-(3-methylbut-2-enyl)benzo[*d*][1,3]dioxol-5(6*H*)-one, **2**, (45 mg, 0.16 mmol, 1 equiv) was dissolved in CH<sub>2</sub>Cl<sub>2</sub> (2 mL) at room temperature and *m*-chloroperbenzoic acid (70%, 36 mg, 0.21 mmol, 1.3 equiv) was added. After stirring for 5 h, the reaction mixture was quenched with saturated aqueous sodium thiosulfate solution and extracted with CH<sub>2</sub>Cl<sub>2</sub>. The organic layer was dried over MgSO<sub>4</sub>, filtered and concentrated. Purification by flash chromatography on silica gel using 20:1 petroleum ether/ethyl acetate furnished **12** as a colourless oil (29 mg, 70%).

IR (neat): 1221 (s), 1385 (s), 1626 (s), 1720 (w) cm<sup>-1</sup>.

<sup>1</sup>H NMR (400 MHz, CDCl<sub>3</sub>): δ 1.18 (3H, s), 1.20 (3H, s), 1.56 (1H, dd, *J* = 14, 7.3 Hz), 2.25 (1H, dd, *J* = 13, 7.5 Hz), 2.35 (1H, dd, *J* = 14, 3.8 Hz), 2.42 (1H, dd, *J* = 7.3, 3.8 Hz), 2.56 (1H, dd, *J* = 13, 7.3 Hz), 4.94-5.06 (2H, m), 5.48-5.61 (1H, m), 5.53 (1H, s), 5.67 (1H, s), 5.82 (1H, s), 5.84 (1H, s).

<sup>13</sup>C NMR (100 MHz, CDCl<sub>3</sub>): δ 19.2, 25.0, 40.4, 46.4, 53.3, 58.1, 61.3, 99.8, 102.0, 109.0, 119.1, 132.5, 144.3, 165.1, 202.4.

MS: *m/z* (M+23) 285.1

HRMS: *m/z* calc'd for C<sub>15</sub>H<sub>18</sub>NaO<sub>4</sub> 285.1097, found 285.1093.

### Synthesis of 6-allyl-6-(2,3-dihydroxy-3-methylbutyl)benzo[*d*][1,3]dioxol-5(6*H*)-one, **11**

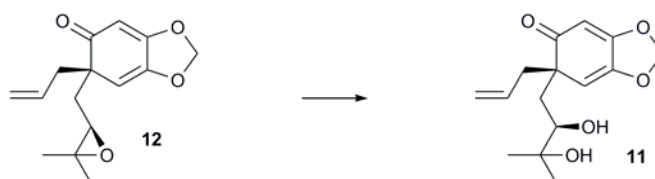

A mixture of 6-allyl-6-((3,3-dimethyloxiran-2-yl)methyl)benzo[*d*][1,3]dioxol-5(6*H*)-one, **12** (49 mg, 0.19 mmol) and water (1.5 mL) was heated at 60 °C overnight. Upon cooling, the mixture was extracted with ethyl acetate, dried over MgSO<sub>4</sub>, filtered and concentrated. Purification by flash chromatography on silica gel using 1:1 to 1:2 petroleum ether/ethyl acetate furnished **11** as a colourless oil (42 mg, 79%).

IR (neat): 1221 (s), 1385 (s), 1626 (s) cm<sup>-1</sup>.

$^1\text{H}$  NMR (400 MHz, acetone- $d^6$ ):  $\delta$  1.03 (3H, s), 1.05 (3H, s), 1.55 (1H, dd,  $J = 14, 9.4$  Hz), 2.19 (1H, d,  $J = 14$  Hz), 2.31 (1H, dd,  $J = 13, 7.4$  Hz), 2.50 (1H, dd,  $J = 13, 7.2$  Hz), 3.00-3.10 (1H, m), 3.42 (1H, br), 3.63 (1H, d,  $J = 5.0$  Hz), 4.88-5.03 (2H, m), 5.52 (1H, s), 5.52-5.64 (1H, m), 5.68 (1H, s), 5.91 (1H, s), 5.94 (1H, s).

$^{13}\text{C}$  NMR (100 MHz, acetone- $d^6$ ):  $\delta$  23.6, 24.8, 42.9, 46.1, 53.0, 72.0, 75.6, 98.4, 101.9, 110.1, 117.2, 133.3, 142.8, 164.9, 201.6.

MS:  $m/z$  (M+23) 303.1

HRMS:  $m/z$  calc'd for  $\text{C}_{15}\text{H}_{20}\text{NaO}_5$  303.1203, found 303.1203.

### NMR spectra for 6-(3-methylbut-2-enyl)benzo[d][1,3]dioxol-5-ol, 3

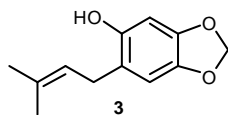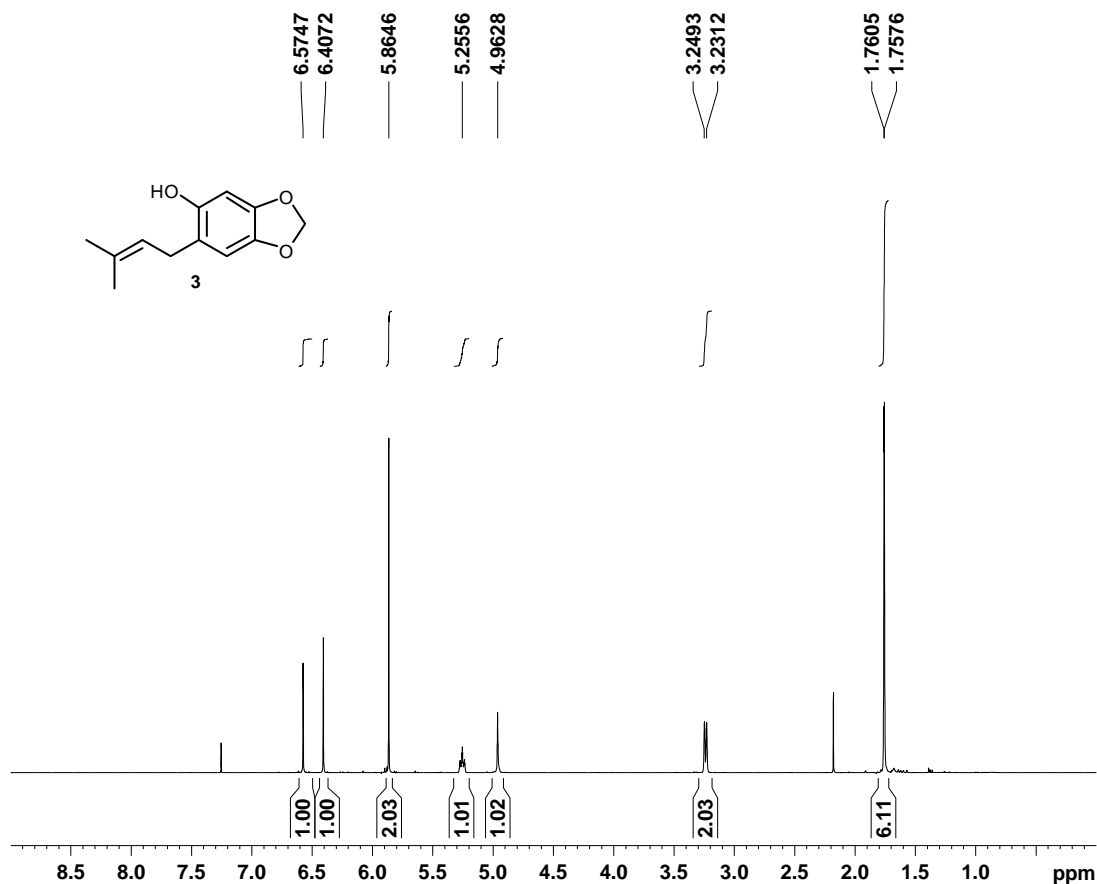

```

Current Data Parameters
NAME      WM-322
EXPNO     5
PROCNO    1

F2 - Acquisition Parameters
Date_     20100420
Time      13.53
INSTRUM   dpx400
PROBHD    5 mm QNP 1H/1
PULPROG   zg30
TD         65536
SOLVENT   CDCl3
NS         16
DS         2
SWH        8278.146 Hz
FIDRES     0.126314 Hz
AQ         3.9584243 sec
RG         181
DW         60.400 usec
DE         6.00 usec
TE         289.9 K
D1         1.00000000 sec
TDO        1

===== CHANNEL f1 =====
NUC1       1H
P1         8.40 usec
PL1        -3.00 dB
SFO1       400.1324710 MHz

F2 - Processing parameters
SI         32768
SF         400.1300118 MHz
WDW        EM
SSB        0
LB         0.30 Hz
GB         0
PC         1.00
    
```

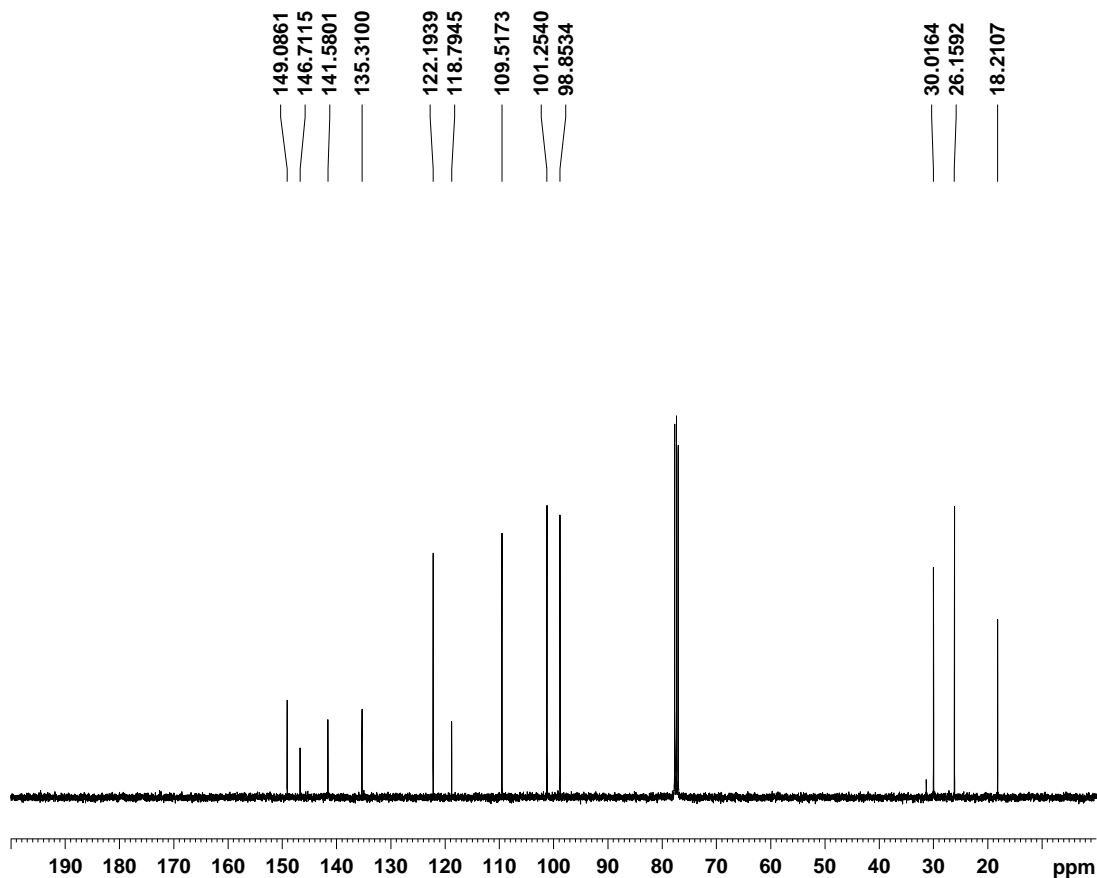

```

Current Data Parameters
NAME      WM-322
EXPNO     6
PROCNO    1

F2 - Acquisition Parameters
Date_     20100420
Time      13.55
INSTRUM   dpx400
PROBHD    5 mm QNP 1H/1
PULPROG   zgpg30
TD         65536
SOLVENT   CDCl3
NS         256
DS         4
SWH        23980.814 Hz
FIDRES     0.365918 Hz
AQ         1.366476 sec
RG         18390.4
DW         20.850 usec
DE         6.00 usec
TE         290.1 K
D1         2.00000000 sec
d11        0.03000000 sec
DELTA     1.89999998 sec
TDO        8

===== CHANNEL f1 =====
NUC1       13C
P1         9.70 usec
PL1        -3.00 dB
SFO1       100.6228298 MHz

===== CHANNEL f2 =====
CPDPRG2   waltz16
NUC2       1H
PCPD2     84.00 usec
PL2        -3.00 dB
PL12      18.00 dB
PL13      18.00 dB
SFO2       400.1316005 MHz

F2 - Processing parameters
SI         32768
SF         100.6127353 MHz
WDW        EM
SSB        0
LB         1.00 Hz
GB         0
PC         1.40
    
```



### NMR spectra for trimethyl(6-(3-methylbut-2-enyl)benzo[d][1,3]dioxol-5-yl)oxysilane, 6

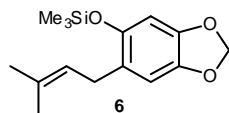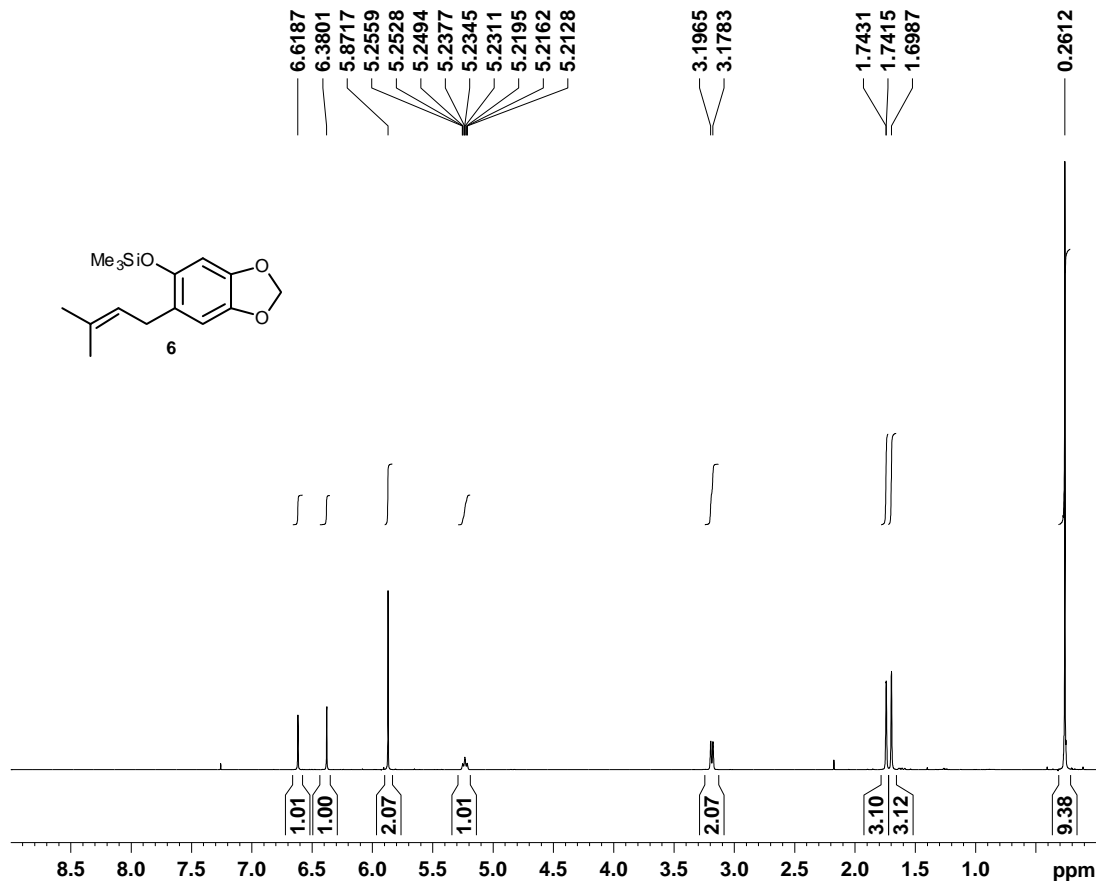

```

Current Data Parameters
NAME      WM-327
EXPNO     3
PROCNO    1

F2 - Acquisition Parameters
Date_     20100422
Time      12.27
INSTRUM   dpx400
PROBHD    5 mm QNP 1H/1
PULPROG   zg30
TD         65536
SOLVENT   CDCl3
NS         16
DS         2
SWH       8278.146 Hz
FIDRES    0.126314 Hz
AQ         3.9584243 sec
RG         64
DW         60.400 usec
DE         6.00 usec
TE         290.6 K
D1         1.00000000 sec
TDO        1

===== CHANNEL f1 =====
NUC1       1H
P1         8.40 usec
PL1        -3.00 dB
SFO1       400.1324710 MHz

F2 - Processing parameters
SI         32768
SF         400.1300099 MHz
WDW        EM
SSB        0
LB         0.30 Hz
GB         0
PC         1.00
    
```

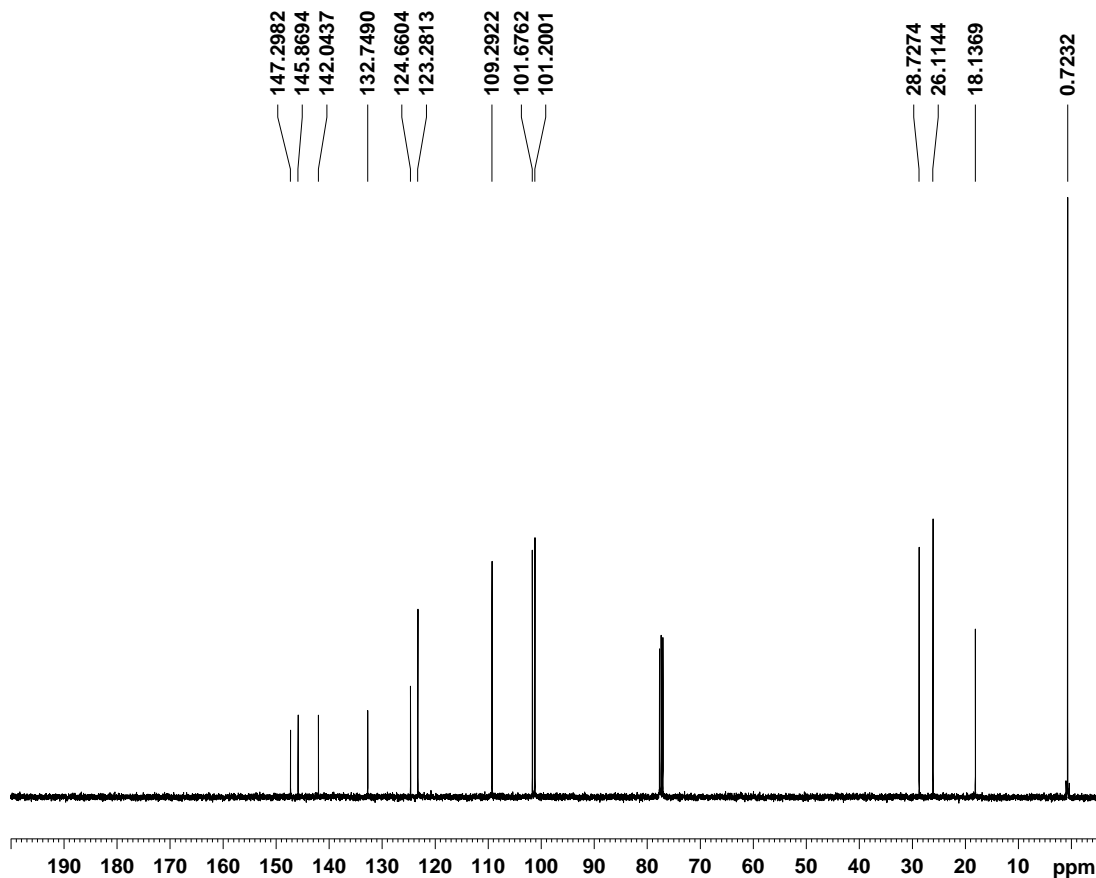

```

Current Data Parameters
NAME      WM-327
EXPNO     4
PROCNO    1

F2 - Acquisition Parameters
Date_     20100422
Time      12.30
INSTRUM   dpx400
PROBHD    5 mm QNP 1H/1
PULPROG   zgpg30
TD         65536
SOLVENT   CDCl3
NS         64
DS         4
SWH       23980.814 Hz
FIDRES    0.365918 Hz
AQ         1.3664756 sec
RG         6502
DW         20.850 usec
DE         6.00 usec
TE         290.9 K
D1         2.00000000 sec
d11        0.03000000 sec
DELTA     1.89999998 sec
TDO        8

===== CHANNEL f1 =====
NUC1       13C
P1         9.70 usec
PL1        -3.00 dB
SFO1       100.6228298 MHz

===== CHANNEL f2 =====
CPDPRG2   waltz16
NUC2       1H
PCPD2     84.00 usec
PL2        -3.00 dB
PL12       18.00 dB
PL13       18.00 dB
SFO2       400.1316005 MHz

F2 - Processing parameters
SI         32768
SF         100.6127690 MHz
WDW        EM
SSB        0
LB         1.00 Hz
GB         0
PC         1.40
    
```

### NMR spectra for 6-allyl-6-(3-methylbut-2-enyl)benzo[d][1,3]dioxol-5(6H)-one, 2

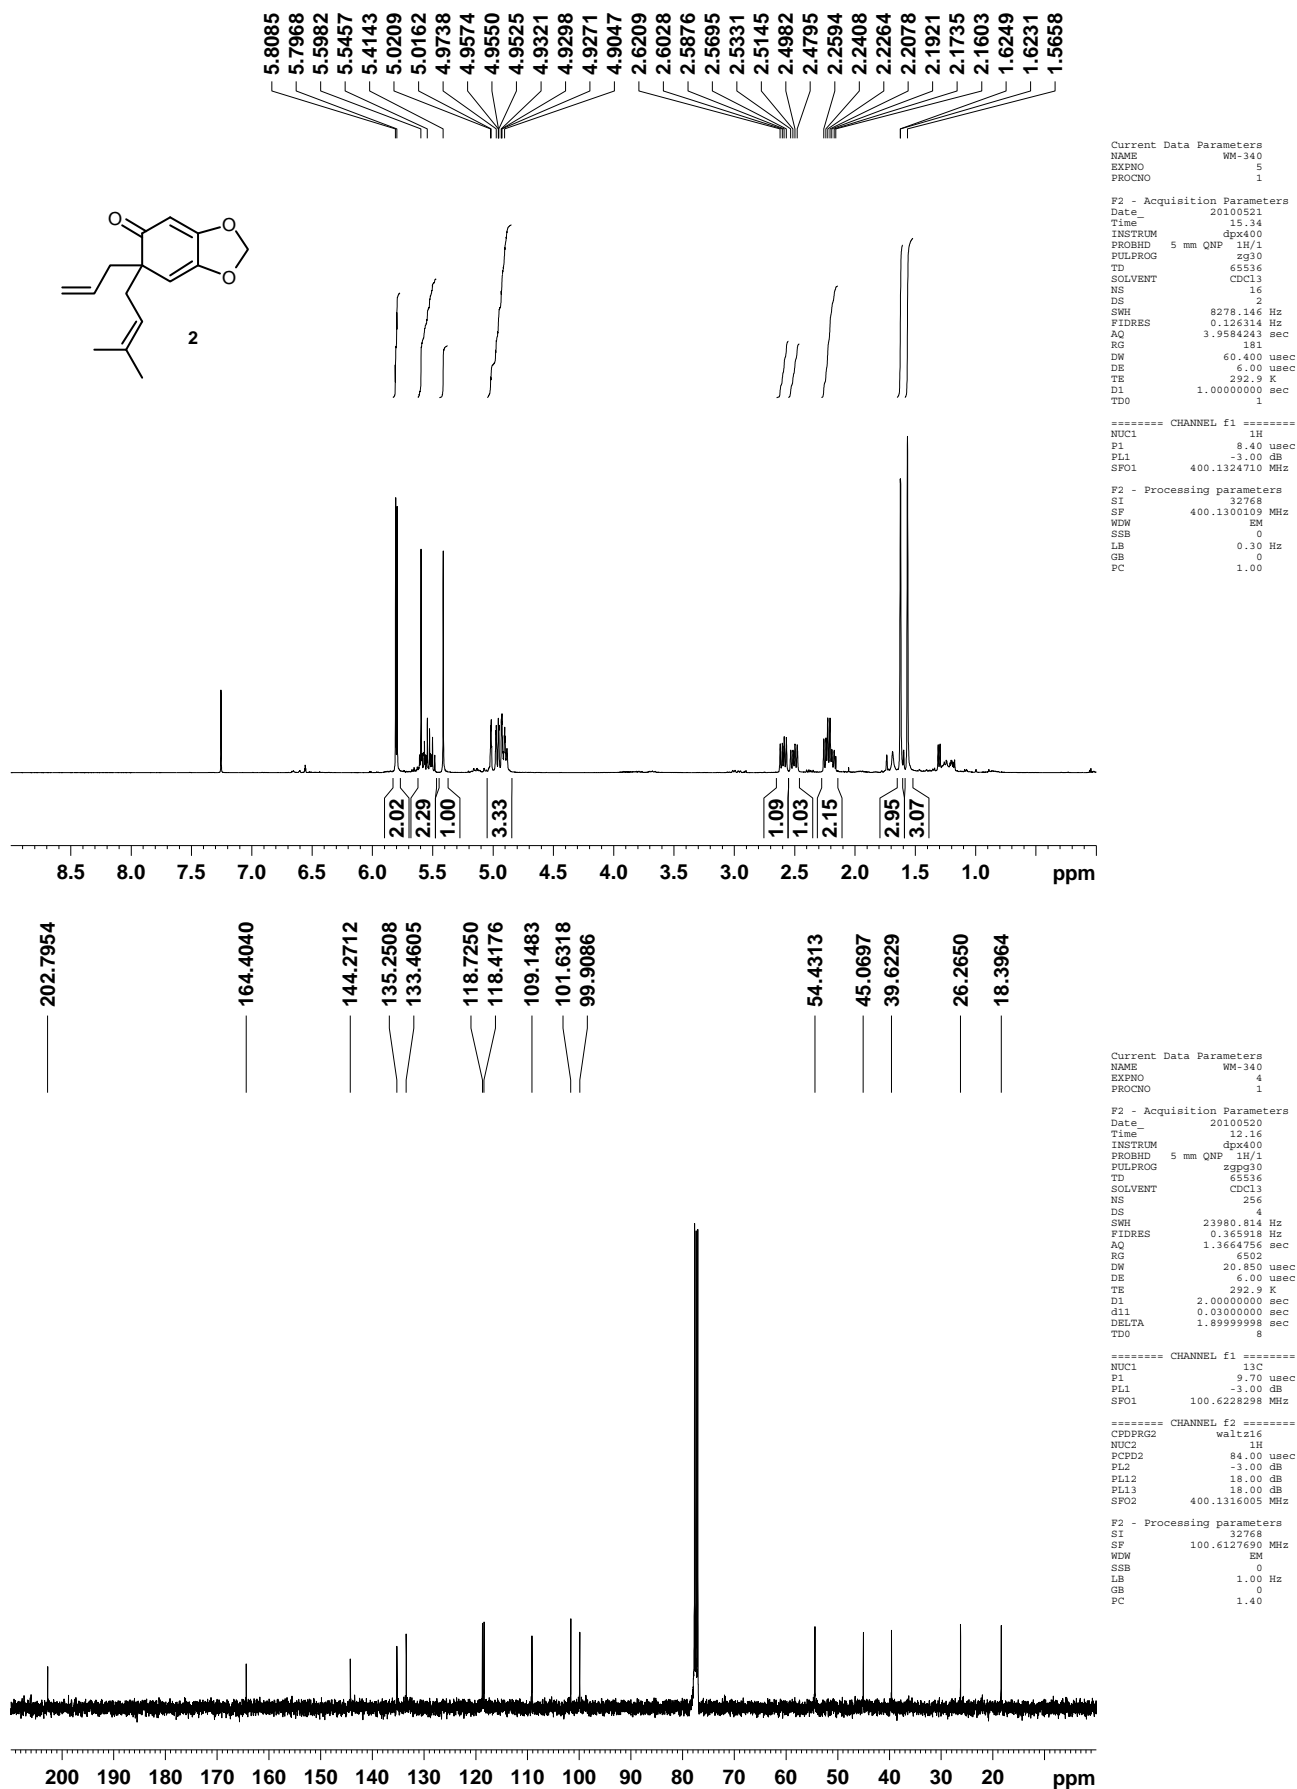

### NMR spectra for 7a-allyl-6-(3-methylbut-2-enyl)benzo[d][1,3]dioxol-5(7aH)-one, 1

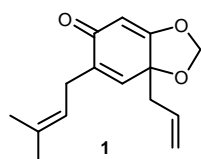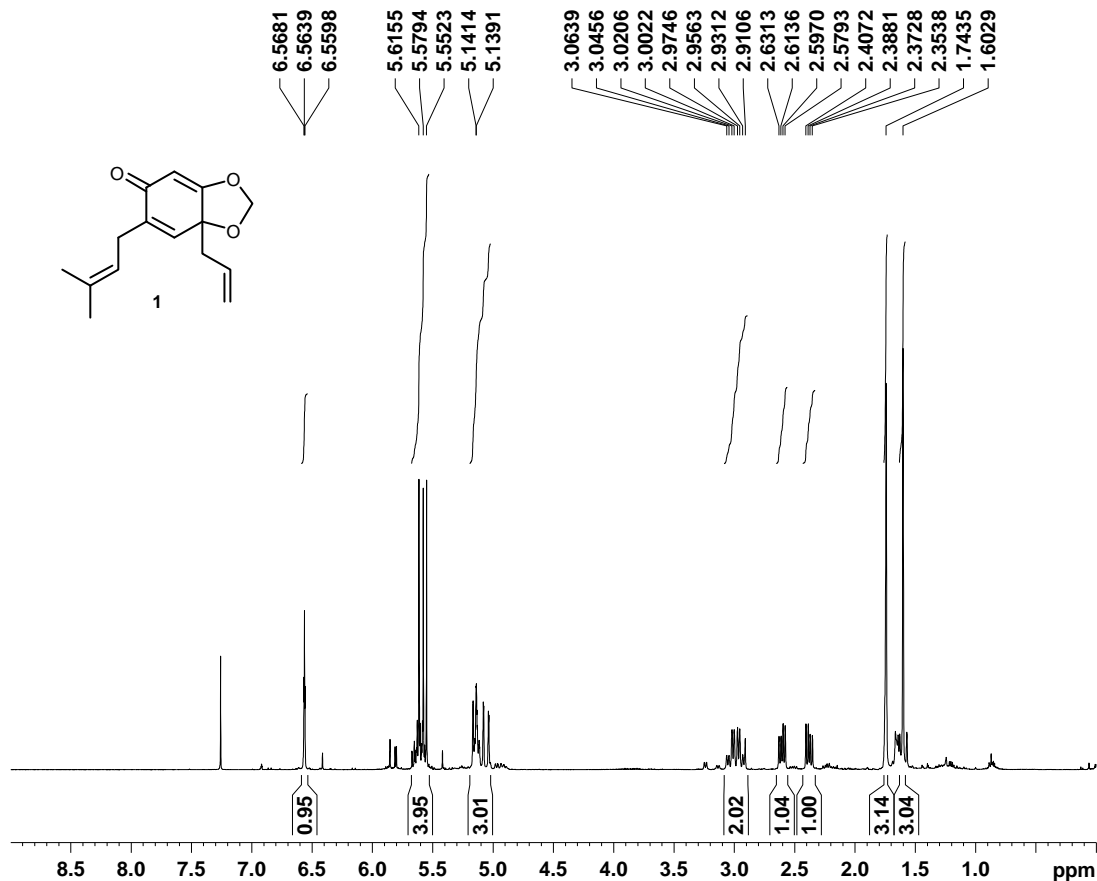

```

Current Data Parameters
NAME      WM-352
EXPNO    4
PROCNO   1

F2 - Acquisition Parameters
Date_    20100607
Time     13.57
INSTRUM  dpx400
PROBHD   5 mm QNP 1H/1
PULPROG  zg30
TD       65536
SOLVENT  CDCl3
NS       16
DS       2
SWH      8278.146 Hz
FIDRES   0.126314 Hz
AQ       3.958243 sec
RG       203.2
DW       60.400 usec
DE       6.00 usec
TE       566.6 K
D1       1.00000000 sec
TDO     1

===== CHANNEL f1 =====
NUC1     1H
P1       8.40 usec
PL1     -3.00 dB
SFO1    400.1324710 MHz

F2 - Processing parameters
SI       32768
SF       400.1300096 MHz
WDW      EM
SSB      0
LB       0.30 Hz
GB       0
PC       1.00
    
```

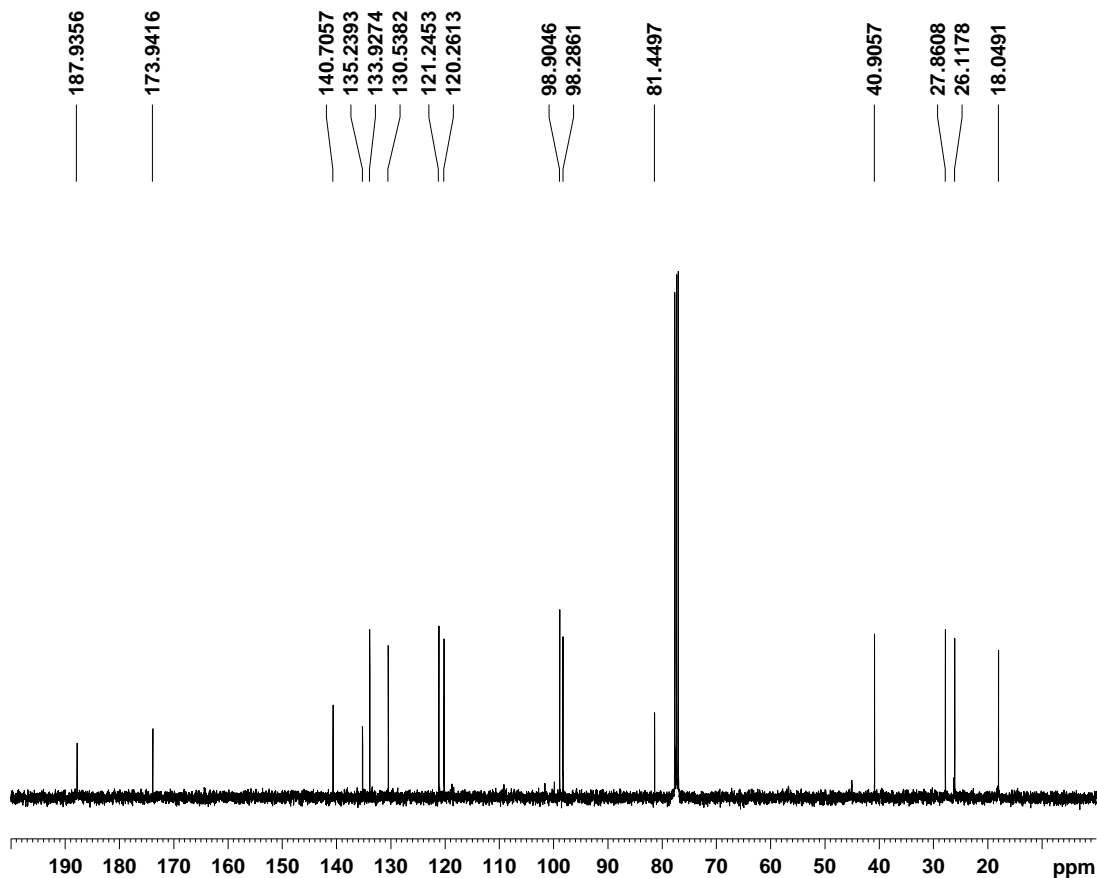

```

Current Data Parameters
NAME      WM-352
EXPNO    7
PROCNO   1

F2 - Acquisition Parameters
Date_    20100608
Time     9.16
INSTRUM  dpx400
PROBHD   5 mm QNP 1H/1
PULPROG  zgpg30
TD       65536
SOLVENT  CDCl3
NS       256
DS       4
SWH      23980.814 Hz
FIDRES   0.365918 Hz
AQ       1.3664756 sec
RG       16384
DW       20.850 usec
DE       6.00 usec
TE       293.1 K
D1       2.00000000 sec
d11      0.03000000 sec
DELTA    1.89999998 sec
TDO     8

===== CHANNEL f1 =====
NUC1     13C
P1       9.70 usec
PL1     -3.00 dB
SFO1    100.6228298 MHz

===== CHANNEL f2 =====
CPDPRG2  waltz16
NUC2     1H
PCPD2    84.00 usec
PL2     -3.00 dB
PL12    18.00 dB
PL13    18.00 dB
SFO2    400.1316005 MHz

F2 - Processing parameters
SI       32768
SF       100.6127690 MHz
WDW      EM
SSB      0
LB       1.00 Hz
GB       0
PC       1.40
    
```

### NMR spectra for 6-(3-methylbut-2-enyl)-7a-(2,2,2-trifluoroethoxy)benzo[d][1,3]dioxol-5(7aH)-one, 7

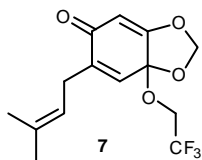

6.5244  
6.5199  
6.5154  
5.6693  
5.6342  
5.6275  
5.1233  
3.8782  
3.8574  
3.8062  
3.7855  
3.1170  
3.0988  
3.0725  
3.0545  
3.0194  
3.0012  
2.9749  
2.9566  
1.7597  
1.6100

```
Current Data Parameters
NAME WM-352
EXPNO 2
PROCNO 1

F2 - Acquisition Parameters
Date_ 20100604
Time 17.43
INSTRUM 4px400
PROBHD 5 mm QNP 1H/1
PULPROG zg30
TD 65536
SOLVENT cdcl3
NS 16
DS 2
SWH 8278.146 Hz
FIDRES 0.126314 Hz
AQ 3.9584243 sec
RG 143.7
DW 60.400 usec
DE 6.00 usec
TE 293.0 K
D1 1.0000000 sec
TDO 1

===== CHANNEL f1 =====
NUC1 1H
P1 8.40 usec
PL1 -3.00 dB
SFO1 400.1324710 MHz

F2 - Processing parameters
SI 32768
SF 400.1300102 MHz
WDW EM
SSB 0
LB 0.30 Hz
GB 0
PC 1.00
```

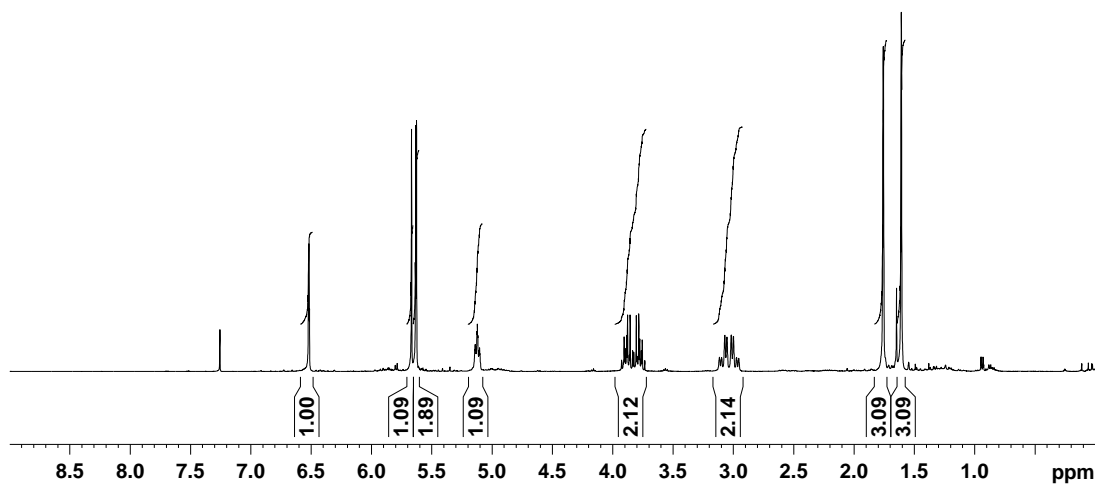

186.7913  
167.1206  
144.6955  
136.2769  
125.6455  
124.9502  
122.1910  
119.1625  
99.9049  
99.3557  
98.2035  
28.0959  
26.1193  
18.0372

```
Current Data Parameters
NAME WM-352
EXPNO 1
PROCNO 1

F2 - Acquisition Parameters
Date_ 20110411
Time 13.12
INSTRUM 4px400
PROBHD 5 mm QNP 1H/1
PULPROG zgpg30
TD 65536
SOLVENT CDCl3
NS 160
DS 4
SWH 23980.814 Hz
FIDRES 0.365918 Hz
AQ 1.3664756 sec
RG 16384
DW 20.850 usec
DE 6.00 usec
TE 291.5 K
D1 2.00000000 sec
d11 0.03000000 sec
DELTA 1.89999998 sec
TDO 8

===== CHANNEL f1 =====
NUC1 13C
P1 9.70 usec
PL1 -3.00 dB
SFO1 100.6228298 MHz

===== CHANNEL f2 =====
CPDPRG2 waltz16
NUC2 1H
PCPD2 84.00 usec
PL2 -3.00 dB
PL12 16.08 dB
PL13 18.00 dB
SFO2 400.1316005 MHz

F2 - Processing parameters
SI 32768
SF 100.6127357 MHz
WDW EM
SSB 0
LB 1.00 Hz
GB 0
PC 1.40
```

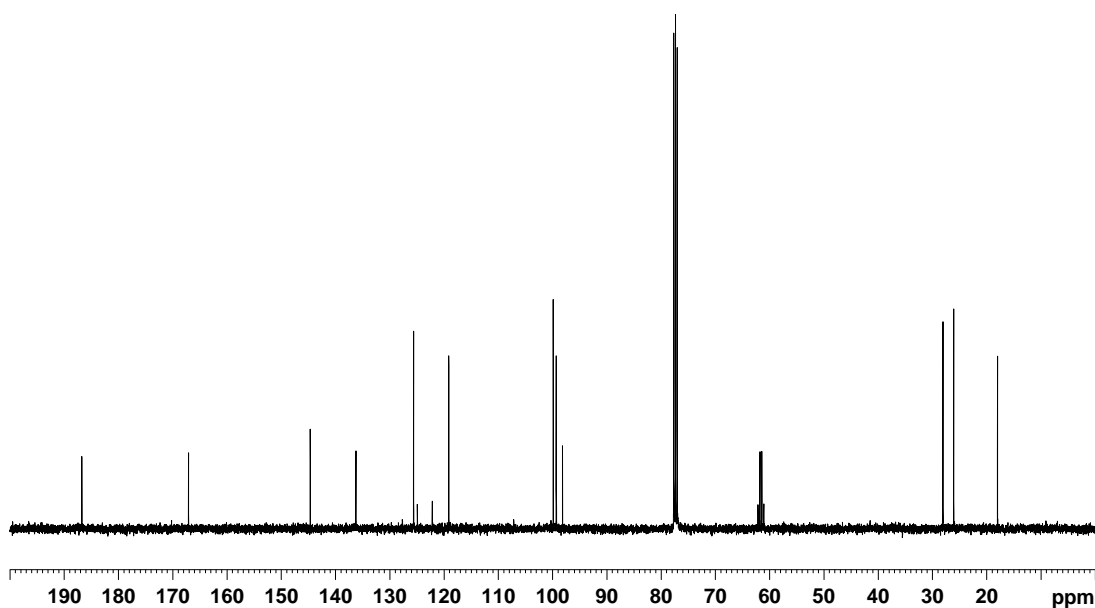

### NMR spectra for illioliganone C

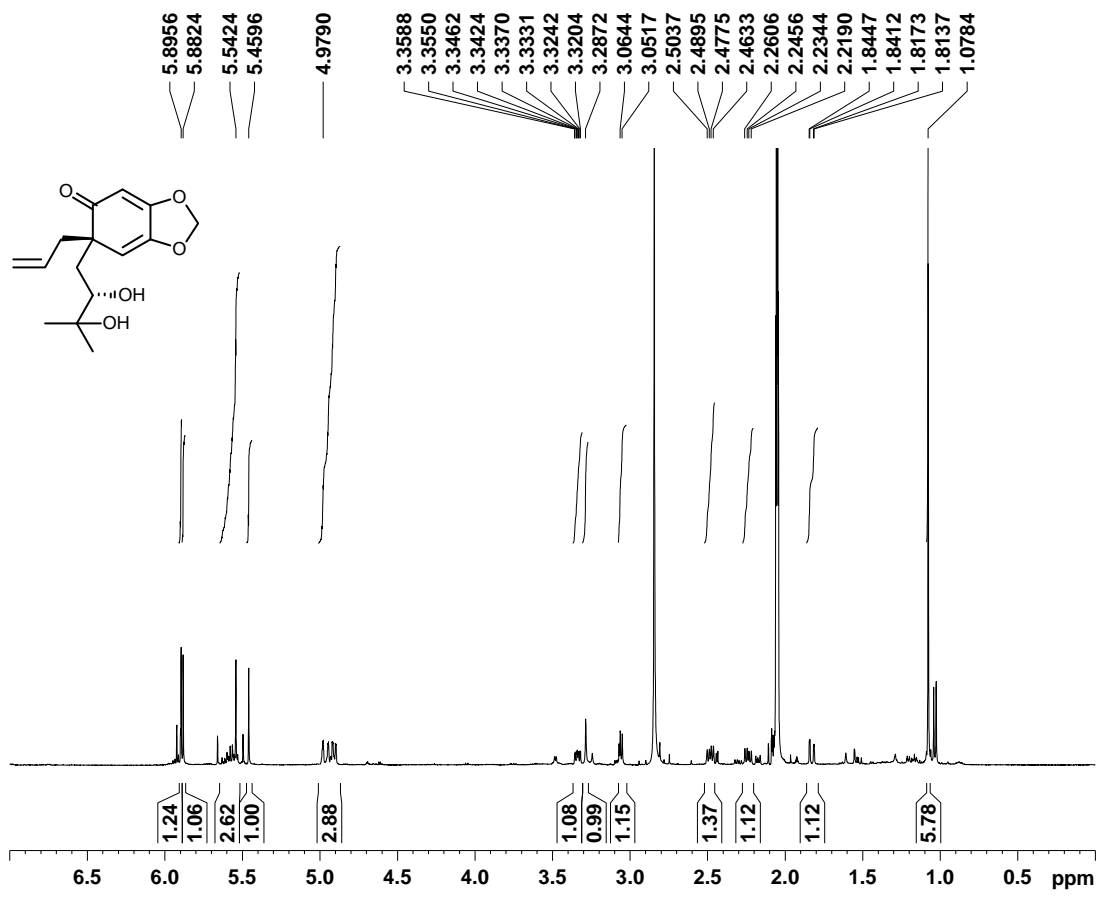

```

Current Data Parameters
NAME      ARM-1136_500
EXPNO    1
PROCNO   1

F2 - Acquisition Parameters
Date_    20110421
Time     10.05
INSTRUM  av500
PROBHD   5 mm PABBO BB-
PULPROG  zg30
TD        65536
SOLVENT  Acetone
NS        16
DS        2
SWH       10000.000 Hz
FIDRES    0.152588 Hz
AQ        3.2768500 sec
RG        287
DW        50.000 usec
DE        6.00 usec
TE        296.5 K
D1        2.0000000 sec
TDO       1

===== CHANNEL f1 =====
NUC1      1H
P1        9.70 usec
PL1       0.10 dB
SFO1      500.1330633 MHz

F2 - Processing parameters
SI        32768
SF        500.1300085 MHz
WDW       EM
SSB       0
LB        0.30 Hz
GB        0
PC        1.00
    
```

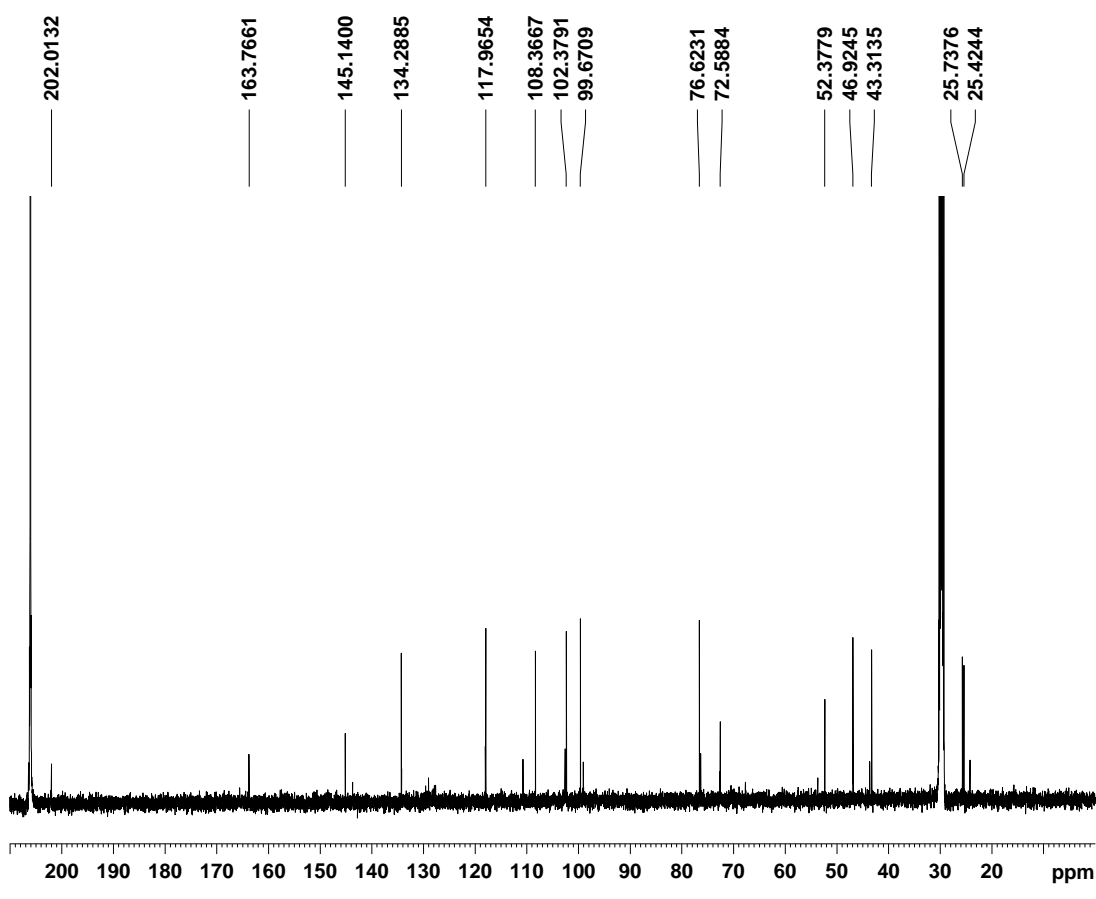

```

Current Data Parameters
NAME      ARM-1136_500
EXPNO    2
PROCNO   1

F2 - Acquisition Parameters
Date_    20110421
Time     10.11
INSTRUM  av500
PROBHD   5 mm PABBO BB-
PULPROG  zgpg30
TD        65536
SOLVENT  Acetone
NS        2527
DS        4
SWH       30030.029 Hz
FIDRES    0.458222 Hz
AQ        1.0912244 sec
RG        11500
DW        16.650 usec
DE        6.00 usec
TE        297.7 K
D1        2.0000000 sec
d11       0.0300000 sec
DELTA    1.8999999 sec
TDO       256

===== CHANNEL f1 =====
NUC1      13C
P1        9.00 usec
PL1       0.00 dB
SFO1      125.7703637 MHz

===== CHANNEL f2 =====
CPDPRG2  waltz16
NUC2      1H
PCPD2    80.00 usec
PL2       0.00 dB
PL12     18.00 dB
PL13     18.00 dB
SFO2      500.1320005 MHz

F2 - Processing parameters
SI        32768
SF        125.7576838 MHz
WDW       EM
SSB       0
LB        1.00 Hz
GB        0
PC        1.00
    
```

NMR spectra for 6-allyl-6-((3,3-dimethyloxiran-2-yl)methyl)benzo[d][1,3]dioxol-5(6H)-one, 12

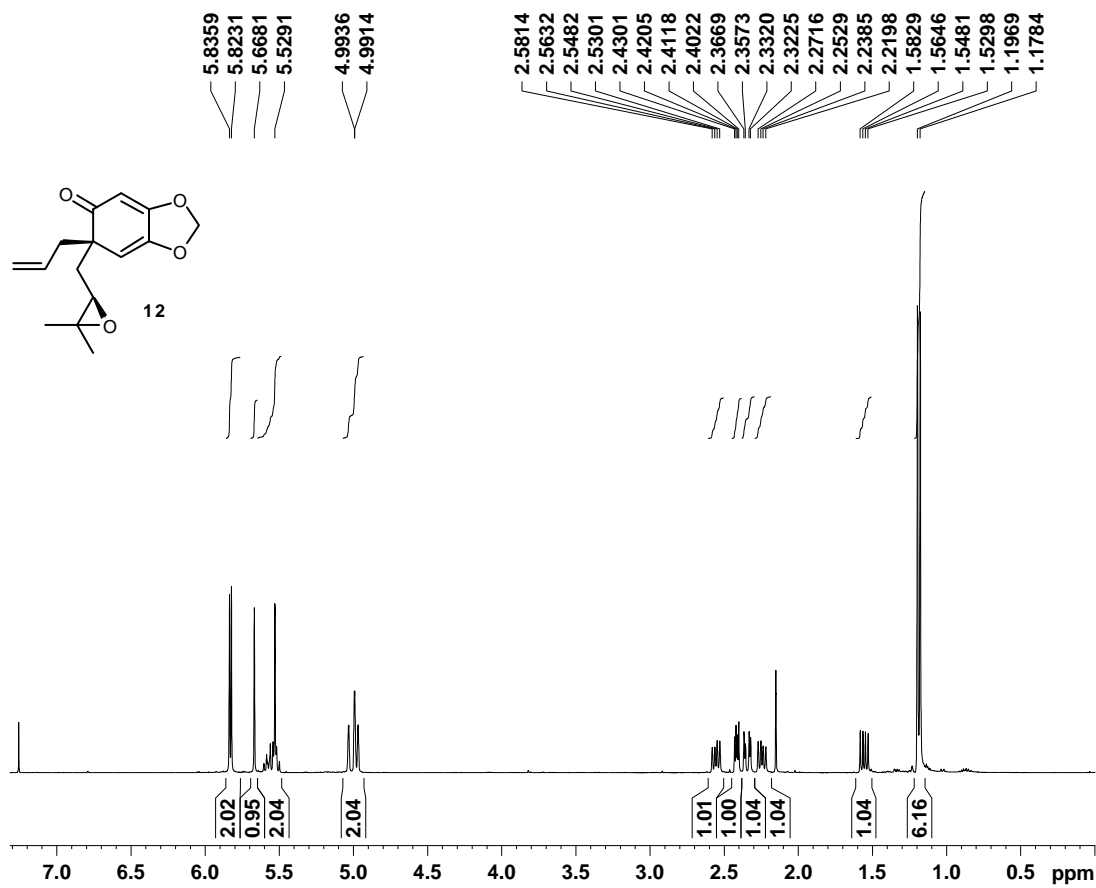

```

Current Data Parameters
NAME      WM-350
EXPNO     4
PROCNO    1

F2 - Acquisition Parameters
Date_     20100602
Time      10.43
INSTRUM   dpx400
PROBHD    5 mm QNP 1H/1
PULPROG   zgpg30
TD         65536
SOLVENT   CDCl3
NS         16
DS         2
SWH        8278.146 Hz
FIDRES     0.126314 Hz
AQ         3.9584243 sec
RG         143.7
DW         60.400 usec
DE         6.00 usec
TE         291.9 K
D1         1.00000000 sec
TDO        1

===== CHANNEL f1 =====
NUC1       1H
P1         8.40 usec
PL1        -3.00 dB
SFO1       400.1324710 MHz

F2 - Processing parameters
SI         32768
SF         400.1300000 MHz
WDW        EM
SSB        0
LB         0.30 Hz
GB         0
PC         1.00
    
```

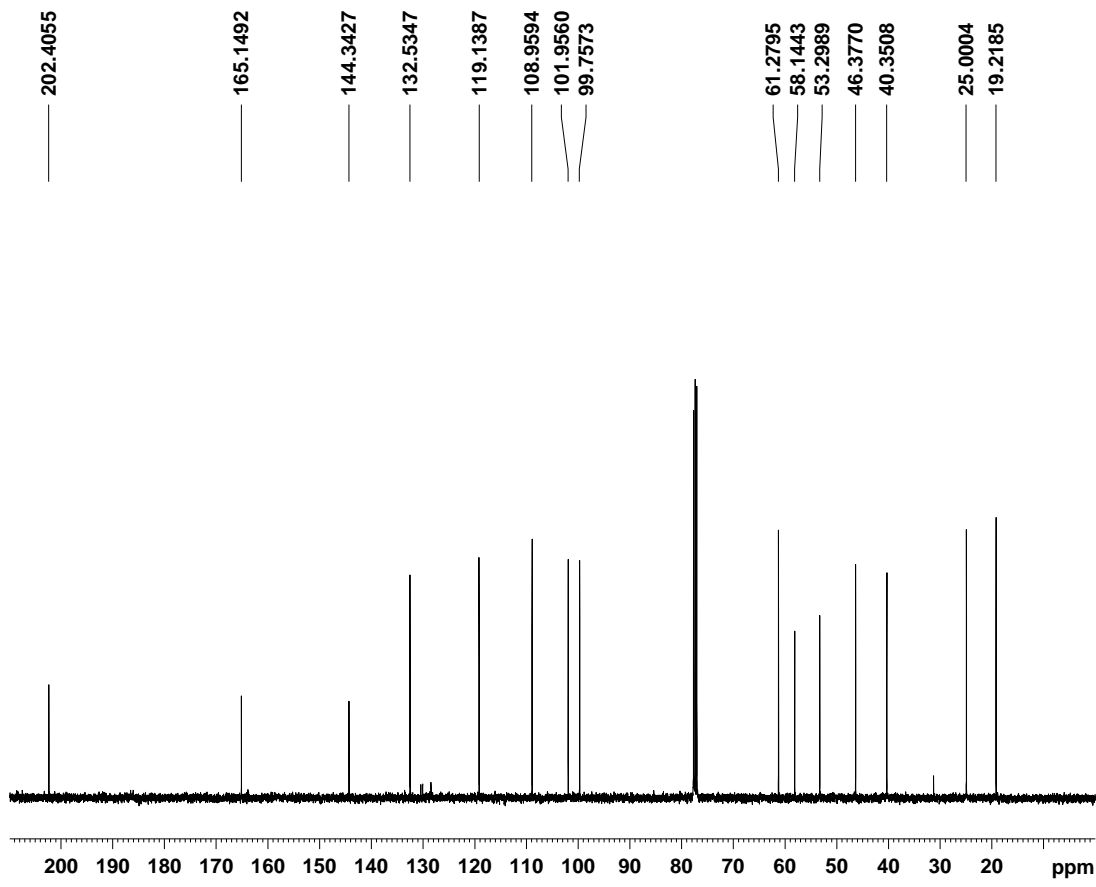

```

Current Data Parameters
NAME      WM-350
EXPNO     5
PROCNO    1

F2 - Acquisition Parameters
Date_     20100602
Time      10.28
INSTRUM   dpx400
PROBHD    5 mm QNP 1H/1
PULPROG   zgpg30
TD         65536
SOLVENT   CDCl3
NS         256
DS         4
SWH        23980.814 Hz
FIDRES     0.365918 Hz
AQ         1.3664756 sec
RG         16384
DW         20.850 usec
DE         6.00 usec
TE         291.9 K
D1         2.00000000 sec
d11        0.03000000 sec
DELTA     1.89999998 sec
TDO        8

===== CHANNEL f1 =====
NUC1       13C
P1         9.70 usec
PL1        -3.00 dB
SFO1       100.6228298 MHz

===== CHANNEL f2 =====
CPDPRG2   waltz16
NUC2       1H
PCPD2     84.00 usec
PL2        -3.00 dB
PL12       18.00 dB
PL13       18.00 dB
SFO2       400.1316005 MHz

F2 - Processing parameters
SI         32768
SF         100.6127690 MHz
WDW        EM
SSB        0
LB         1.00 Hz
GB         0
PC         1.40
    
```

### NMR spectra for 6-allyl-6-(2,3-dihydroxy-3-methylbutyl)benzo[d][1,3]dioxol-5(6H)-one, 11

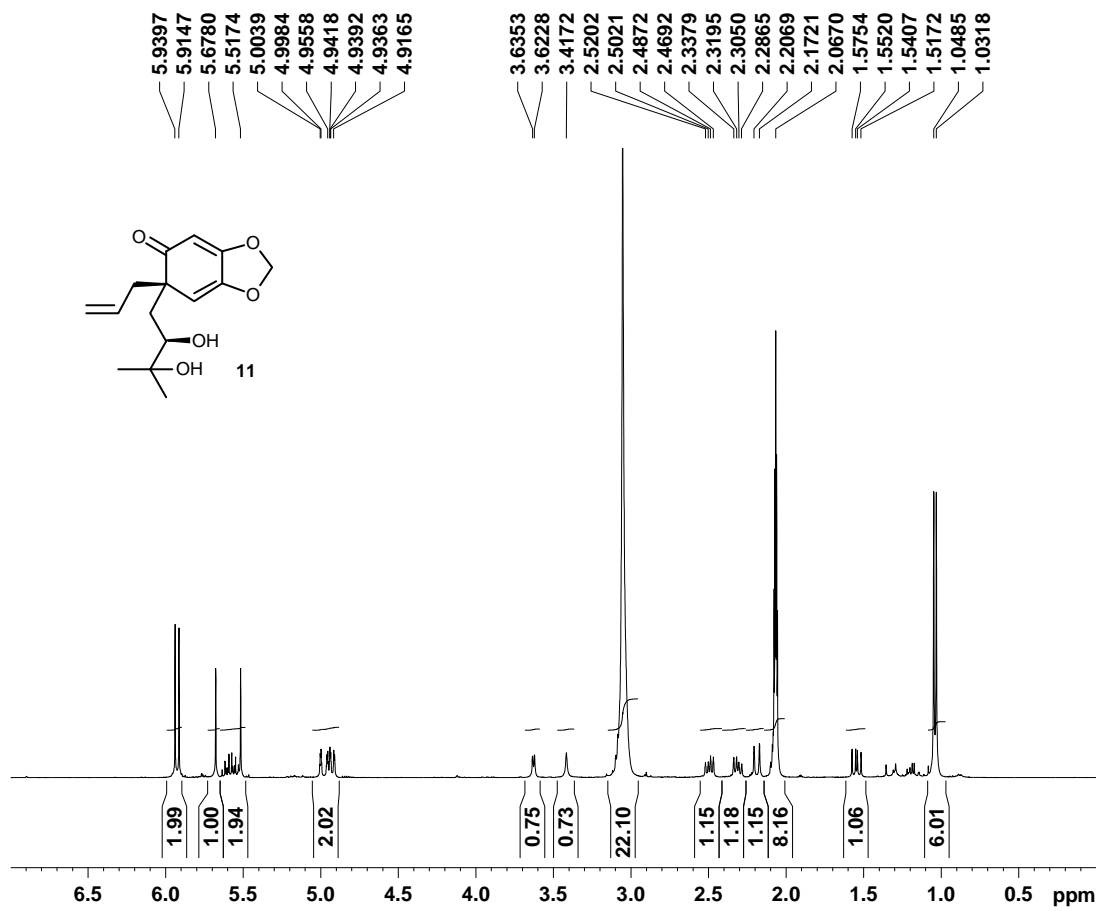

```

Current Data Parameters
NAME      WM-410
EXPNO    4
PROCNO   1

F2 - Acquisition Parameters
Date_    20101014
Time     9.24
INSTRUM  spect400
PROBHD   5 mm QNP 1H/1
PULPROG  zg30
TD       65536
SOLVENT  Aceton
NS       16
DS       2
SWH      8278.146 Hz
FIDRES   0.126314 Hz
AQ       3.9584243 sec
RG       143.7
DW       60.400 usec
DE       6.00 usec
TE       290.9 K
D1       1.0000000 sec
TDO      1

===== CHANNEL f1 =====
NUC1     1H
P1       8.40 usec
PL1     -3.00 dB
SFO1    400.1324710 MHz

F2 - Processing parameters
SI       32768
SF      400.1300000 MHz
WDW      EM
SSB      0
LB       0.30 Hz
GB       0
PC       1.00
    
```

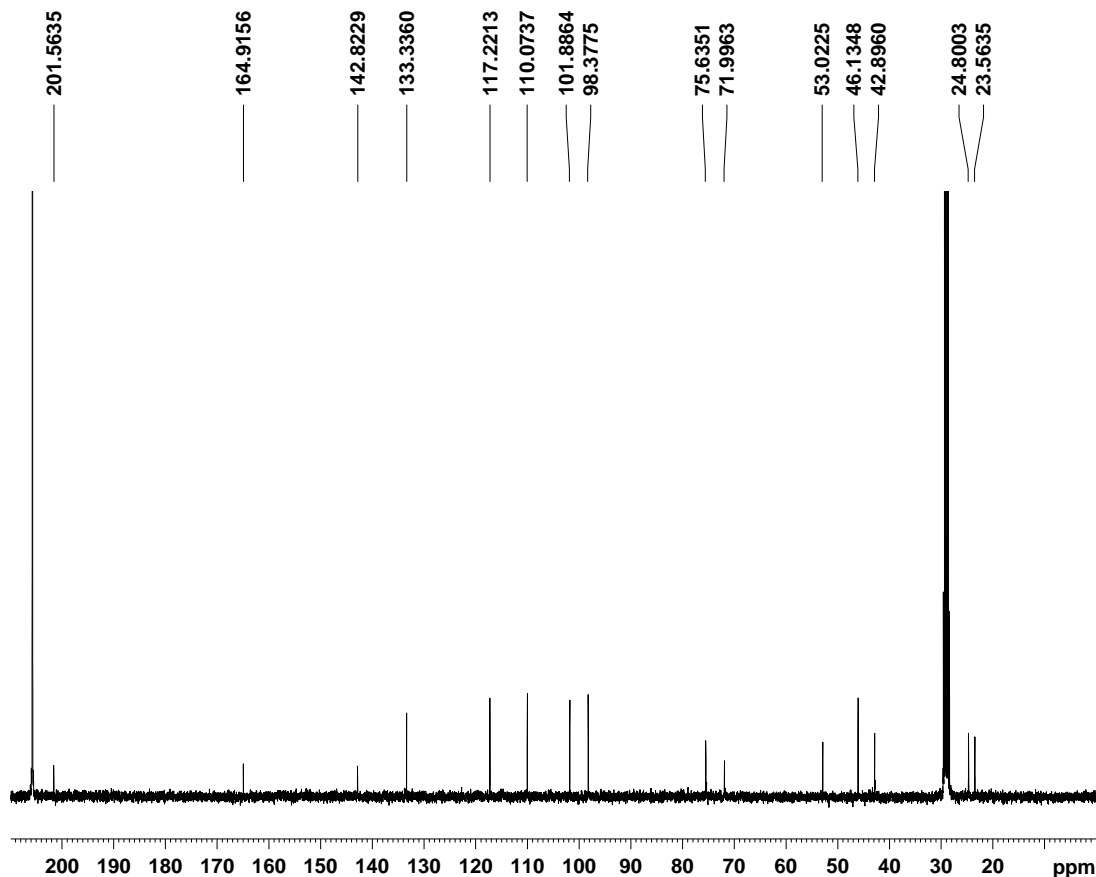

```

Current Data Parameters
NAME      WM-410
EXPNO    5
PROCNO   1

F2 - Acquisition Parameters
Date_    20101014
Time     9.27
INSTRUM  spect400
PROBHD   5 mm QNP 1H/1
PULPROG  zgpg30
TD       65536
SOLVENT  Aceton
NS       256
DS       4
SWH      23980.814 Hz
FIDRES   0.365918 Hz
AQ       1.3664756 sec
RG       11585.2
DW       20.850 usec
DE       6.00 usec
TE       291.1 K
D1       2.0000000 sec
d11      0.0300000 sec
DELTA    1.8999999 sec
TDO      8

===== CHANNEL f1 =====
NUC1     13C
P1       9.70 usec
PL1     -3.00 dB
SFO1    100.6228298 MHz

===== CHANNEL f2 =====
PCPD2    waltz16
NUC2     1H
PCPD2    84.00 usec
PL2     -3.00 dB
PL12    18.00 dB
PL13    18.00 dB
SFO2    400.1316005 MHz

F2 - Processing parameters
SI       32768
SF      100.6127690 MHz
WDW      EM
SSB      0
LB       1.00 Hz
GB       0
PC       1.40
    
```
